# Supplementary material
Source: Springer Nature journal article supplement (https://www.springermedizin.de/resource/supplementary/12913_2010_1374_MOESM3_ESM.pdf/9528000)

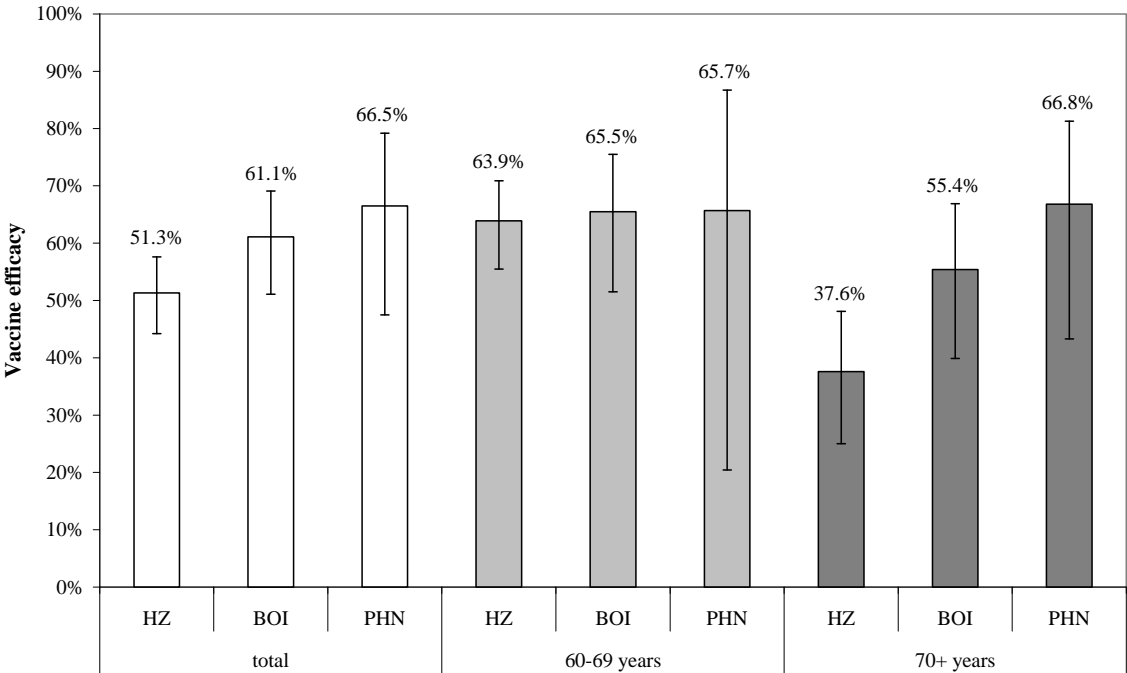

Supplement: MOESM3 [file 9528000]
